# Supplementary material for: A colorimetric method for use within portable test kits for nitrate determination in various water matrices
Source: Royal Society of Chemistry journal article supplement (doi:10.1039/c6ay03190k), 2017-01-01
Supplement: c6ay03190k1.pdf [file c6ay03190k1.pdf]

## Designs of portable test kit incorporating nitrate method

Pictograph instructions, for ease of use when using the test kit, are illustrated in figure A below. Additionally, the potential packaging design and a nitrate colour chart for estimation of nitrate concentrations present within a sample are highlighted in figure B.

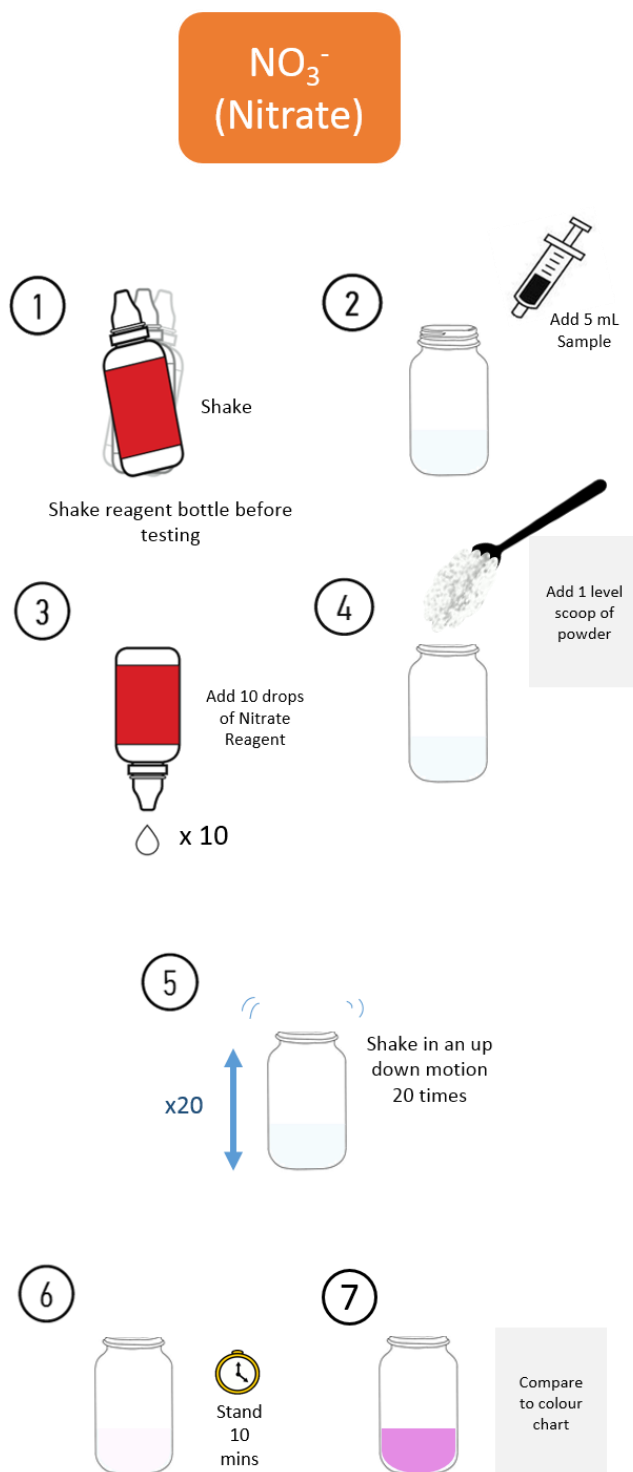

**Figure A:** Pictograph instructions for carrying out the developed nitrate method

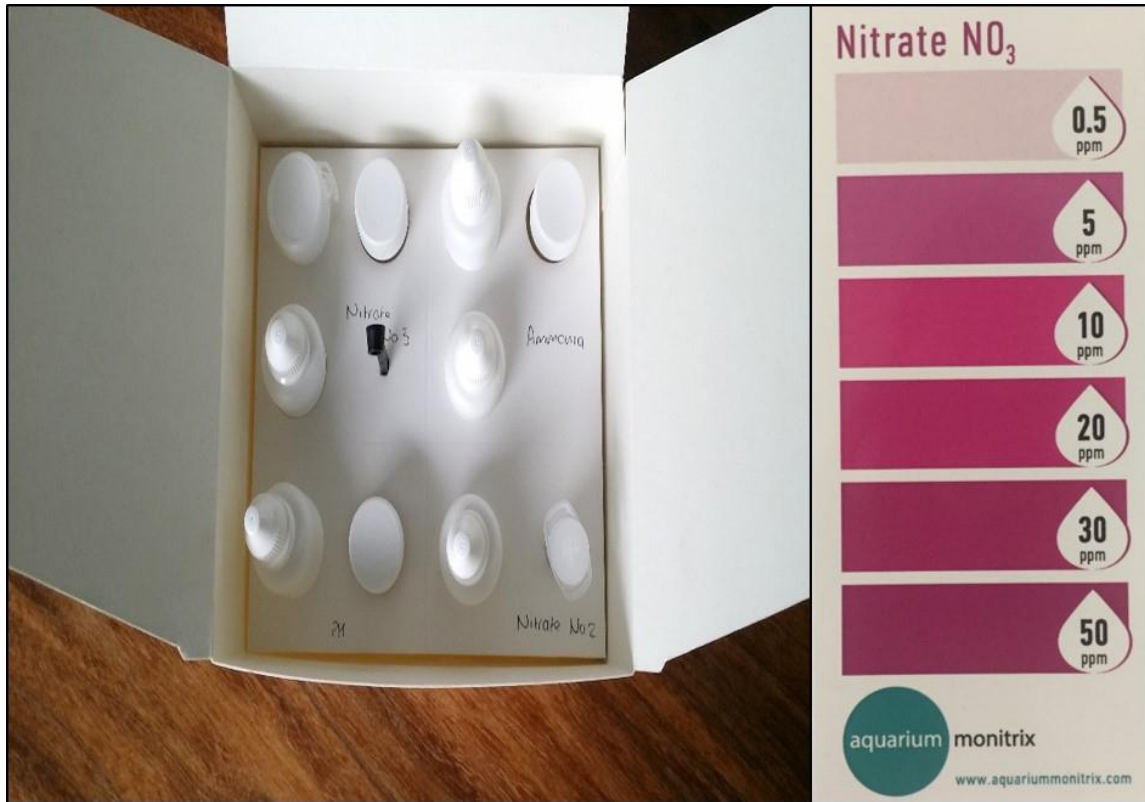

**Figure B:** Potential packaging design and nitrate concentration colour chart
